# Supplementary material
Source: PubMed Central journal article supplement (PMC10069820)
Supplement: mmc1.pdf [file mmc1.pdf]

# THE LANCET Planetary Health

## Supplementary appendix

This appendix formed part of the original submission and has been peer reviewed.  
We post it as supplied by the authors.

Supplement to: Shepon A, Wu T, Kremen C, et al. Exploring scenarios for the food system–zoonotic risk interface. *Lancet Planet Health* 2023; 7: e329–35.

## Supplementary appendix

### Exploring scenarios for the food system-zoonotic risk interface

Alon Shepon, Tong Wu, Claire Kremen, Tamar Dayan, Ivette Perfecto, Jessica Fanzo, Gidon Eshel, Christopher D. Golden

**Department of Environmental Studies, The Porter School of the Environment and Earth Sciences (A Shepon, PhD), The Steinhardt Museum of Natural History (A Shepon, Prof T Dayan, PhD) and School of Zoology (Prof T Dayan), Tel Aviv University, Tel Aviv 6997801, Israel; The Natural Capital Project, Stanford University, Stanford, CA, USA (T Wu, PhD); Institute of Resources, Environment and Sustainability, Biodiversity Research Center and Department of Zoology, The University of British Columbia, Vancouver, BC, Canada (Prof C Kremen, PhD); School for Environment and Sustainability, University of Michigan, Ann Arbor, MI, USA (Prof I Perfecto, PhD); School of Advanced International Studies, Berman Institute of Bioethics and Bloomberg School of Public Health, Baltimore, MD, USA (Prof J Fanzo, PhD); Department of Environmental Science, Bard College, Annandale-on-Hudson, NY, USA (Prof G Eshel, PhD); Department of Nutrition, and Department of Environmental Health, Harvard TH Chan School of Public Health, Boston, MA, USA (Prof C D Golden, PhD).**

**Table S1: Average risk score of all food system-related drivers for zoonotic spillover for each of the four food system typologies (scenarios) explored. The values are illustrated in the Figure.**

| <b>Food system-related drivers</b>  | <b>industrial animal-based scenario</b> | <b>agroecological animal-based scenario</b> | <b>industrial plant-based scenario</b> | <b>agroecological plant-based scenario</b> |
|-------------------------------------|-----------------------------------------|---------------------------------------------|----------------------------------------|--------------------------------------------|
| Biodiversity loss                   | 5                                       | 3                                           | 3                                      | 1                                          |
| Land fragmentation                  | 4                                       | 4                                           | 2                                      | 2                                          |
| Pesticide use                       | 4                                       | 1                                           | 3                                      | 1                                          |
| Irrigation and water infrastructure | 3                                       | 2                                           | 3                                      | 1                                          |
| Fertilizer                          | 4                                       | 2                                           | 3                                      | 1                                          |
| Antibiotics use                     | 4                                       | 3                                           | 2                                      | 1                                          |
| Wildlife hunting                    | 5                                       | 5                                           | 5                                      | 2                                          |
| Livestock                           | 5                                       | 3                                           | 2                                      | 1                                          |
| Aquaculture                         | 4                                       | 2                                           | 3                                      | 1                                          |
| Farmworkers densities               | 4                                       | 4                                           | 3                                      | 3                                          |

|                                                               |    |    |    |    |
|---------------------------------------------------------------|----|----|----|----|
| within agrofood systems (not referring to overall population) |    |    |    |    |
| Sum of scenario                                               | 42 | 29 | 29 | 14 |
